# Supplementary material for: Influence of Ocean Alkalinity Enhancement with Olivine or Steel Slag on a Coastal Plankton Community in Tasmania
Source: Copernicus journal article supplement (doi:10.5194/egusphere-2023-2120), 2023-09-18
Supplement: Supplementary file 1 [file egusphere-2023-2120-supplement.pdf]

# Influence of Ocean Alkalinity Enhancement with Olivine or Steel Slag on a Coastal Plankton Community in Tasmania

Jiaying A. Guo<sup>1,2</sup>, Robert F. Strzepek<sup>2</sup>, Kerrie M. Swadling<sup>1,2</sup>, Ashley T. Townsend<sup>3</sup>, Lennart T. Bach<sup>1</sup>

<sup>1</sup>Institute for Marine and Antarctic Studies, University of Tasmania, Hobart, Tasmania, 7000 Australia

<sup>2</sup>Australian Antarctic Program Partnership (AAPP), Institute for Marine and Antarctic Studies, University of Tasmania, Hobart, Tasmania, 7000 Australia

<sup>3</sup>Central Science Laboratory, University of Tasmania, Sandy Bay, Tasmania, 7005 Australia

Correspondence to: Jiaying A. Guo (Jiaying.guo@utas.edu.au)

## Supplements

**Table S1. The GAM of biochemical parameters.** The formula is the established formula of variables in R. Estimates are the estimated mean effects from different treatments on the measured parameters. The GLM family and link were set as “gaussian, identity” in the “glm()” function in R. If the estimate is positive (Treatment A -Treatment B >0), it means the estimated mean effects of treatment A are larger than treatment B. If the estimate is positive (Treatment A -Treatment B <0), it means the estimated mean effects of treatment A are smaller than treatment B. The “P\_mean” represents the p-values of estimated means and the “P\_smooths” represents the p-values of two smooth terms of GAMs (see Method 2.5). If P\_mean value is <0.05, then the GAMs from the two compared treatments have significant differences in the overall mean values. If P\_smooths value is <0.05, then the two GAMs from the two compared treatments have significant trends.

| Formula                                                                                                  | Treatment comparisons | Estimate | P_mean | P_smooths | R_adj |
|----------------------------------------------------------------------------------------------------------|-----------------------|----------|--------|-----------|-------|
| pH = Treatment + s(Day, k = 10, fx = TRUE) + s(Day, by = oTreatment, k = 10, fx = TRUE)                  | Olivine - Control     | 0.044    | <0.001 | <0.001    | 0.980 |
|                                                                                                          | Slag - Control        | 0.355    | <0.001 | <0.001    |       |
|                                                                                                          | Olivine - Slag        | -0.311   | <0.001 | <0.001    |       |
| Bsi Con. = Treatment + s(Day, k = 8, fx = TRUE) + s(Day, by = oTreatment, k = 7, fx = TRUE)              | Slag - Control        | 2.015    | 0.010  | 0.012     | 0.605 |
|                                                                                                          | Olivine - Control     | -0.503   | 0.614  | 0.016     |       |
|                                                                                                          | Olivine - Slag        | -2.518   | 0.015  | 0.269     |       |
| Total alkalinity Con. = Treatment + s(Day, k = 8, fx = TRUE) + s(Day, by = oTreatment, k = 8, fx = TRUE) | Slag - Control        | 250.188  | <0.001 | <0.001    | 0.992 |
|                                                                                                          | Olivine - Control     | 24.702   | <0.001 | 0.061     |       |
|                                                                                                          | Olivine - Slag        | -225.486 | <0.001 | <0.001    |       |

|                                                                                                               |                   |         |        |        |       |
|---------------------------------------------------------------------------------------------------------------|-------------------|---------|--------|--------|-------|
| Chlorophyll-a Con. = Treatment + s(Day, k = 10, fx = TRUE) + s(Day, by = oTreatment, k = 10, fx = TRUE)       | Slag - Control    | -0.080  | 0.401  | 0.493  | 0.815 |
|                                                                                                               | Olivine - Control | -0.048  | 0.617  | 0.922  |       |
|                                                                                                               | Olivine - Slag    | 0.033   | 0.732  | 0.691  |       |
| NOx- Con. = Treatment + s(Day, k = 10, fx = TRUE) + s(Day, by = oTreatment, k = 10, fx = TRUE)                | Slag - Control    | -0.056  | 0.165  | 0.993  | 0.862 |
|                                                                                                               | Olivine - Control | -0.051  | 0.209  | 0.854  |       |
|                                                                                                               | Olivine - Slag    | 0.005   | 0.892  | 0.585  |       |
| PO43- Con. = Treatment + s(Day, k = 10, fx = TRUE) + s(Day, by = oTreatment, k = 10, fx = TRUE)               | Slag - Control    | 1.790   | <0.001 | <0.001 | 0.984 |
|                                                                                                               | Olivine - Control | 0.070   | 0.016  | 0.677  |       |
|                                                                                                               | Olivine - Slag    | -1.720  | <0.001 | <0.001 |       |
| Si(OH)4 Con. = Treatment + s(Day, k = 10, fx = TRUE) + s(Day, by = oTreatment, k = 10, fx = TRUE)             | Slag - Control    | 31.681  | <0.001 | <0.001 | 0.982 |
|                                                                                                               | Olivine - Control | 9.278   | <0.001 | <0.001 |       |
|                                                                                                               | Olivine - Slag    | -22.402 | <0.001 | <0.001 |       |
| Micro phytoplankton Con. = Treatment + s(Day, k = 10, fx = TRUE) + s(Day, by = oTreatment, k = 10, fx = TRUE) | Slag - Control    | 0.131   | <0.001 | 0.004  | 0.637 |
|                                                                                                               | Olivine - Control | 0.095   | <0.001 | 0.023  |       |
|                                                                                                               | Olivine - Slag    | -0.035  | 0.114  | 0.915  |       |
| Nanoeukaryotes1 Con. = Treatment + s(Day, k = 10, fx = TRUE) + s(Day, by = oTreatment, k = 10, fx = TRUE)     | Slag - Control    | 0.053   | 0.803  | 0.996  | 0.889 |
|                                                                                                               | Olivine - Control | 0.909   | <0.001 | <0.001 |       |
|                                                                                                               | Olivine - Slag    | 0.857   | <0.001 | 0.004  |       |
| Nanoeukaryotes2 Con. = Treatment + s(Day, k = 10, fx = TRUE) + s(Day, by = oTreatment, k = 10, fx = TRUE)     | Slag - Control    | 0.218   | 0.047  | 0.985  | 0.631 |
|                                                                                                               | Olivine - Control | 0.586   | <0.001 | 0.002  |       |
|                                                                                                               | Olivine - Slag    | 0.368   | 0.001  | 0.038  |       |
| Pico eukaryotes Con. = Treatment + s(Day, k = 10, fx = TRUE) + s(Day, by = oTreatment, k = 10, fx = TRUE)     | Slag - Control    | -2.050  | 0.395  | 0.994  | 0.761 |
|                                                                                                               | Olivine - Control | 6.519   | 0.008  | 0.919  |       |
|                                                                                                               | Olivine - Slag    | 8.569   | <0.001 | 0.607  |       |
| Cyanobacteria Con. = Treatment + s(Day, k = 10, fx = TRUE) + s(Day, by = oTreatment, k = 10, fx = TRUE)       | Slag - Control    | 0.236   | 0.839  | 0.962  | 0.764 |
|                                                                                                               | Olivine - Control | 5.205   | <0.001 | <0.001 |       |
|                                                                                                               | Olivine - Slag    | 4.969   | <0.001 | <0.001 |       |
|                                                                                                               | Slag - Control    | 0.003   | 0.570  | 0.465  | 0.897 |
|                                                                                                               | Olivine - Control | 0.017   | 0.003  | <0.001 |       |

|                                                                                                                   |                   |         |        |        |       |
|-------------------------------------------------------------------------------------------------------------------|-------------------|---------|--------|--------|-------|
| Cryptophytes Con. = Treatment + s(Day, k = 10, fx = TRUE) + s(Day, by = oTreatment, k = 10, fx = TRUE)            | Olivine - Slag    | 0.013   | 0.015  | <0.001 |       |
|                                                                                                                   | Slag - Control    | -0.256  | 0.109  | 0.777  |       |
| Bacteria_1 /Bacteria_2 ratio = Treatment + s(Day, k = 10, fx = TRUE) + s(Day, by = oTreatment, k = 10, fx = TRUE) | Olivine - Control | 0.628   | <0.001 | 0.221  | 0.787 |
|                                                                                                                   | Olivine - Slag    | 0.884   | <0.001 | 0.004  |       |
|                                                                                                                   | Slag - Control    | 0.154   | <0.001 | <0.001 |       |
| Alpha = Treatment + s(Day, k = 10, fx = TRUE) + s(Day, by = oTreatment, k = 10, fx = TRUE)                        | Olivine - Control | 0.183   | <0.001 | <0.001 | 0.839 |
|                                                                                                                   | Olivine - Slag    | 0.030   | 0.030  | 0.001  |       |
|                                                                                                                   | Slag - Control    | 23.732  | <0.001 | 0.094  |       |
| ETRmax = Treatment + s(Day, k = 10, fx = TRUE) + s(Day, by = oTreatment, k = 10, fx = TRUE)                       | Olivine - Control | 35.844  | <0.001 | <0.001 | 0.673 |
|                                                                                                                   | Olivine - Slag    | 12.112  | 0.025  | 0.138  |       |
|                                                                                                                   | Slag - Control    | -17.806 | 0.141  | 0.474  |       |
| Ek = Treatment + s(Day, k = 10, fx = TRUE) + s(Day, by = oTreatment, k = 10, fx = TRUE)                           | Olivine - Control | -4.885  | 0.685  | 0.168  | 0.248 |
|                                                                                                                   | Olivine - Slag    | 12.920  | 0.284  | 0.947  |       |
|                                                                                                                   | Slag - Control    | 0.124   | <0.001 | <0.001 |       |
| Fv/Fm = Treatment + s(Day, k = 10, fx = TRUE) + s(Day, by = oTreatment, k = 10, fx = TRUE)                        | Olivine - Control | 0.138   | <0.001 | <0.001 | 0.827 |
|                                                                                                                   | Olivine - Slag    | 0.015   | 0.173  | 0.026  |       |
|                                                                                                                   | Slag - Control    | 0.094   | <0.001 | 0.011  |       |
| Micro_percent = Treatment + s(Day, k = 10, fx = TRUE) + s(Day, by = oTreatment, k = 10, fx = TRUE)                | Olivine - Control | 0.067   | 0.012  | 0.003  | 0.272 |
|                                                                                                                   | Olivine - Slag    | -0.027  | 0.295  | 0.992  |       |
|                                                                                                                   | Slag - Control    | -0.011  | 0.007  | 0.009  |       |
| Nano1_percent = Treatment + s(Day, k = 10, fx = TRUE) + s(Day, by = oTreatment, k = 10, fx = TRUE)                | Olivine - Control | -0.010  | 0.016  | 0.007  | 0.254 |
|                                                                                                                   | Olivine - Slag    | 0.001   | 0.777  | 1.000  |       |
|                                                                                                                   | Slag - Control    | -0.074  | <0.001 | 0.001  |       |
| Nano2_percent = Treatment + s(Day, k = 10, fx = TRUE) + s(Day, by = oTreatment, k = 10, fx = TRUE)                | Olivine - Control | -0.057  | 0.004  | <0.001 | 0.295 |
|                                                                                                                   | Olivine - Slag    | 0.017   | 0.382  | 0.996  |       |
|                                                                                                                   | Slag - Control    | -0.001  | 0.092  | 0.981  |       |
|                                                                                                                   | Olivine - Control | 0.000   | 0.235  | 0.957  | 0.413 |
|                                                                                                                   | Slag - Control    |         |        |        |       |

|                                                                                                    |                   |        |       |       |       |
|----------------------------------------------------------------------------------------------------|-------------------|--------|-------|-------|-------|
| Pico_percent = Treatment + s(Day, k = 10, fx = TRUE) + s(Day, by = oTreatment, k = 10, fx = TRUE)  | Olivine - Slag    | 0.000  | 0.619 | 1.000 |       |
|                                                                                                    | Slag - Control    | 0.000  | 0.232 | 1.000 | 0.670 |
| Cyano_percent = Treatment + s(Day, k = 10, fx = TRUE) + s(Day, by = oTreatment, k = 10, fx = TRUE) | Olivine - Control | 0.000  | 0.460 | 0.631 |       |
|                                                                                                    | Olivine - Slag    | 0.000  | 0.652 | 0.635 |       |
| Cryp_percent = Treatment + s(Day, k = 10, fx = TRUE) + s(Day, by = oTreatment, k = 10, fx = TRUE)  | Slag - Control    | -0.009 | 0.427 | 0.602 | 0.309 |
|                                                                                                    | Olivine - Control | 0.000  | 0.977 | 0.160 |       |
|                                                                                                    | Olivine - Slag    | 0.009  | 0.414 | 0.729 |       |

**Table S2. The GLM of trace metal data.** In the content column, “Dissolved” represents the dissolved trace metal concentrations from the seawater; “Total” is the total particulate trace metal. Estimates are the estimated effects from different treatments on the concentrations of trace metals. The “Treatment” in the formula represent three conditions: “Control”, “Olivine”, and “Slag”. Please note that, if the Family and link is “Gamma inverse”, then the larger estimate values are (Treatment A – Treatment B), the Treatment B has large effects on the Treatment A. The P values were calculated from Tukey tests. If the P value is <0.05, it means the two compared treatments have significant differences on the trace metal’s concentrations.

| Element | Content   | Treatments comparison | Estimate | P values | Formula                                  | GLM Family and Link | Test  |
|---------|-----------|-----------------------|----------|----------|------------------------------------------|---------------------|-------|
| Al      | Dissolved | Olivine - Control     | -0.002   | <0.001   | Concentration = Treatment + Zday + Zday2 | Gamma inverse       | Tukey |
|         |           | Slag - Control        | -0.002   | <0.001   |                                          |                     |       |
|         |           | Slag - Olivine        | 0.000    | 0.189    |                                          |                     |       |
| Mn      | Dissolved | Olivine - Control     | 0.002    | 0.722    | Concentration = Treatment + Zday + Zday2 | Gamma inverse       | Tukey |
|         |           | Slag - Control        | -0.015   | <0.001   |                                          |                     |       |
|         |           | Slag - Olivine        | -0.017   | <0.001   |                                          |                     |       |
| Fe      | Dissolved | Olivine - Control     | -0.003   | 0.237    | Concentration = Treatment + Zday + Zday2 | Gamma inverse       | Tukey |
|         |           | Slag - Control        | -0.001   | 0.865    |                                          |                     |       |
|         |           | Slag - Olivine        | 0.002    | 0.502    |                                          |                     |       |
| Ni      | Dissolved | Olivine - Control     | -0.031   | <0.001   | Concentration = Treatment + Zday + Zday2 | Gamma inverse       | Tukey |
|         |           | Slag - Control        | 0.002    | 0.956    |                                          |                     |       |
|         |           | Slag - Olivine        | 0.033    | <0.001   |                                          |                     |       |
| Cu      | Dissolved | Olivine - Control     | -0.020   | 0.068    | Concentration = Treatment + Zday + Zday2 | Gamma inverse       | Tukey |
|         |           | Slag - Control        | 0.014    | 0.462    |                                          |                     |       |
|         |           | Slag - Olivine        | 0.034    | 0.003    |                                          |                     |       |
| Zn      | Dissolved | Olivine - Control     | 0.003    | 0.127    | Concentration = Treatment + Zday + Zday2 | Gamma inverse       | Tukey |
|         |           | Slag - Control        | 0.002    | 0.332    |                                          |                     |       |
|         |           | Slag - Olivine        | -0.001   | 0.853    |                                          |                     |       |
| Mn      | Total     | Olivine - Control     | 14.005   | 0.270    |                                          |                     | Tukey |

|    |       |                   |         |        |                                               |                      |       |
|----|-------|-------------------|---------|--------|-----------------------------------------------|----------------------|-------|
|    |       | Slag - Control    | 20.178  | 0.067  | Concentrations<br>= 1 +<br>Treatment +<br>Day | Gaussian<br>identity |       |
|    |       | Slag - Olivine    | 6.173   | 0.775  |                                               |                      |       |
| Fe | Total | Olivine - Control | 134.460 | 0.003  | Concentrations<br>= 1 +<br>Treatment +<br>Day | Gaussian<br>identity | Tukey |
|    |       | Slag - Control    | 140.605 | 0.002  |                                               |                      |       |
|    |       | Slag - Olivine    | 6.145   | 0.988  |                                               |                      |       |
| Ni | Total | Olivine - Control | 4.238   | <0.001 | Concentrations<br>= 1 +<br>Treatment +<br>Day | Gaussian<br>identity | Tukey |
|    |       | Slag - Control    | -0.040  | 0.999  |                                               |                      |       |
|    |       | Slag - Olivine    | -4.278  | <0.001 |                                               |                      |       |
| Zn | Total | Olivine - Control | -2.135  | 0.676  | Concentrations<br>= 1 +<br>Treatment +<br>Day | Gaussian<br>identity | Tukey |
|    |       | Slag - Control    | -0.645  | 0.965  |                                               |                      |       |
|    |       | Slag - Olivine    | 1.490   | 0.826  |                                               |                      |       |

**Table S3. The GLM of zooplankton abundance.** Each species has its own GLM with “Treatment” and “Day” as its variables. The estimate is the estimated mean of the difference between two compared treatments. The family and link were set as “Gamm, inverse” in “glm()” function in R. The p-values were calculated from Tukey tests. If the p-values is <0.05, then the two compared treatments have significant differences in their influence on this species’ abundance.

| Species or Parameters | Treatment comparison | Estimate | P values | Formula                                               | GLM Family and Link | Test  |
|-----------------------|----------------------|----------|----------|-------------------------------------------------------|---------------------|-------|
| Oithona               | Olivine - Control    | 0.087    | 0.931    | Species abundance = 1 +<br>Treatment + Day +<br>Day^2 | Gamma inverse       | Tukey |
|                       | Slag - Control       | 0.041    | 0.983    |                                                       |                     |       |
|                       | Slag - Olivine       | -0.045   | 0.981    |                                                       |                     |       |
| Penilia               | Olivine - Control    | 1.960    | 0.093    | Species abundance = 1 +<br>Treatment + Day +<br>Day^2 | Gamma inverse       | Tukey |
|                       | Slag - Control       | -0.080   | 0.961    |                                                       |                     |       |
|                       | Slag - Olivine       | -2.041   | 0.074    |                                                       |                     |       |
| Calanoid              | Olivine - Control    | -0.550   | 0.291    | Species abundance = 1 +<br>Treatment + Day +<br>Day^2 | Gamma inverse       | Tukey |
|                       | Slag - Control       | -0.392   | 0.587    |                                                       |                     |       |
|                       | Slag - Olivine       | 0.158    | 0.826    |                                                       |                     |       |
| Noctiluca             | Olivine - Control    | -0.598   | 0.025    | Species abundance = 1 +<br>Treatment + Day +<br>Day^2 | Gamma inverse       | Tukey |
|                       | Slag - Control       | -0.298   | 0.484    |                                                       |                     |       |
|                       | Slag - Olivine       | 0.299    | 0.070    |                                                       |                     |       |
| Oikopleura            | Olivine - Control    | 0.158    | 0.958    |                                                       | Gamma inverse       | Tukey |

|                         |                   |        |        |                                                 |                   |       |
|-------------------------|-------------------|--------|--------|-------------------------------------------------|-------------------|-------|
|                         | Slag - Control    | -0.177 | 0.890  | Species abundance = 1 + Treatment + Day + Day^2 |                   |       |
|                         | Slag - Olivine    | -0.335 | 0.786  |                                                 |                   |       |
| Shannon Diversity Index | Olivine - Control | -0.293 | <0.001 | Shannon Diversity Index = 1 + Treatment + Day   | Gaussian identity | Tukey |
|                         | Slag - Control    | -0.030 | 0.916  |                                                 |                   |       |
|                         | Slag - Olivine    | 0.263  | 0.001  |                                                 |                   |       |

**Table S4. The ratio of non-surface to total particulate trace metal concentrations.** The results were average values  $\pm$  standard error.

| Metal | Treatment    |                 |                 |                 |
|-------|--------------|-----------------|-----------------|-----------------|
|       | Pre-addition | Control         | Olivine         | Slag            |
|       | Day 1        | Day 22          | Day 22          | Day 22          |
| Fe    | 0.99         | 1.25 $\pm$ 0.15 | 0.94 $\pm$ 0.05 | 0.96 $\pm$ 0.10 |
| Mn    | 0.24         | 0.87 $\pm$ 0.53 | 0.29 $\pm$ 0.13 | 0.72 $\pm$ 0.04 |
| Ni    | 0.74         | 0.73 $\pm$ 0.34 | 1.02 $\pm$ 0.09 | 1.87 $\pm$ 0.46 |
| Zn    | 0.86         | 0.77 $\pm$ 0.11 | 0.52 $\pm$ 0.10 | 0.85 $\pm$ 0.14 |

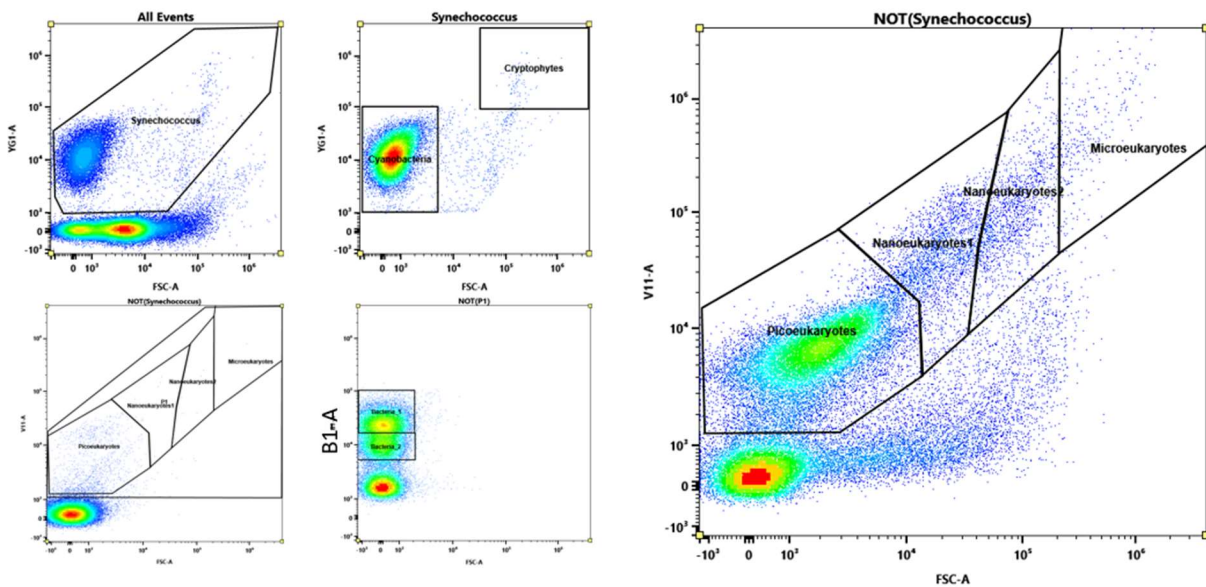

**Fig. S1. The gate information of flow cytometry data.**

(a)

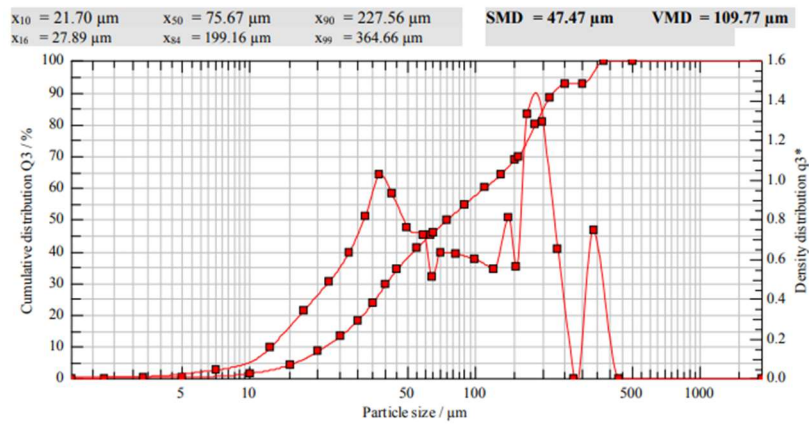

(b)

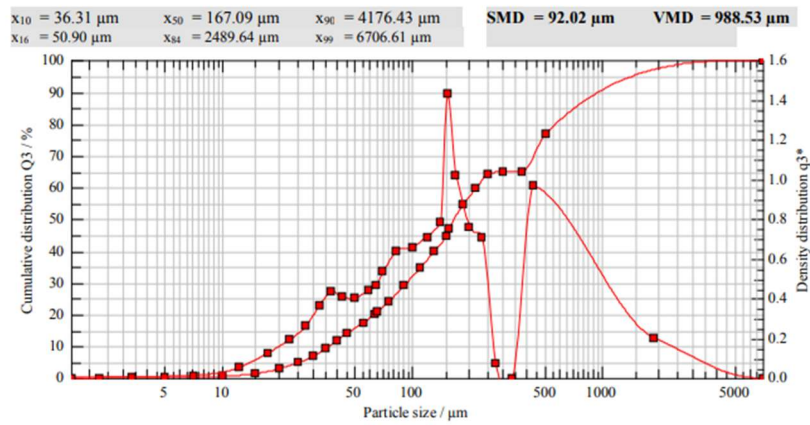

**Fig. S2. The particle size spectrum of OAE materials.** (a) the ground olivine minerals from Mortlake, Australia; (b) the ground slag minerals from South Australia, Australia. Cumulative distribution Q3 is the accumulative volume of the measured particles

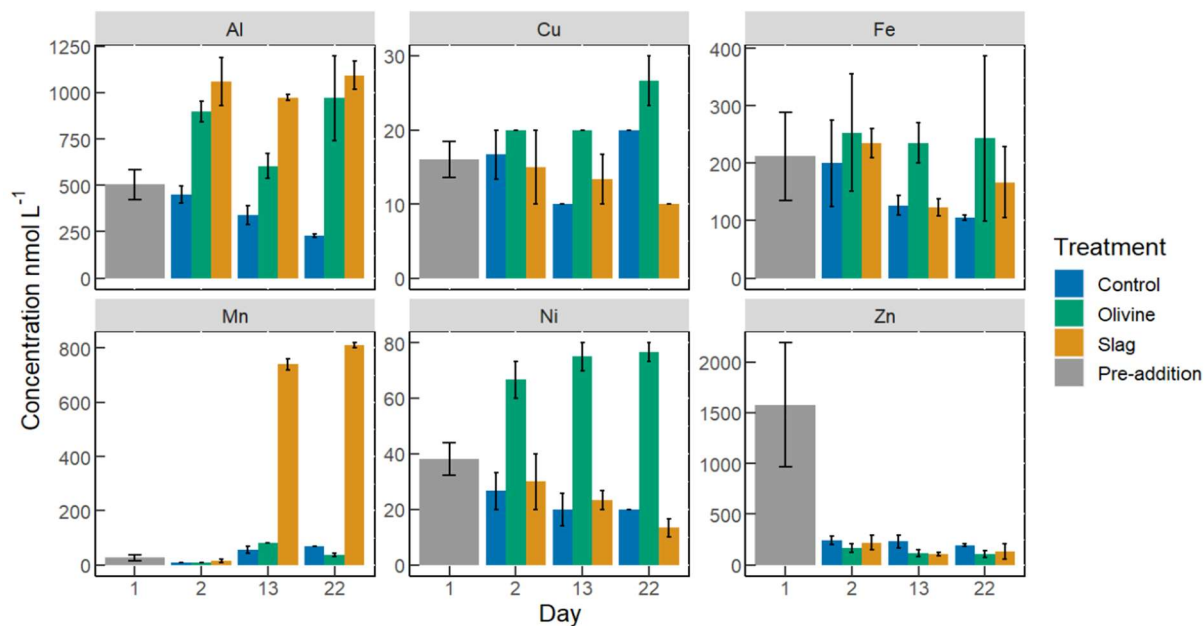

**Fig. S3.** Dissolved trace metal concentrations in microcosm seawater. The error bars represent the standard error from measured samples. The pre-addition data shown here represent the average of 5 microcosms before addition of slag or olivine. The data for the slag treatment on day 2, the olivine treatment on day 13, and for the control on day 22 is based on two of three microcosm replicates. The remaining data were based on all three microcosm replicates.

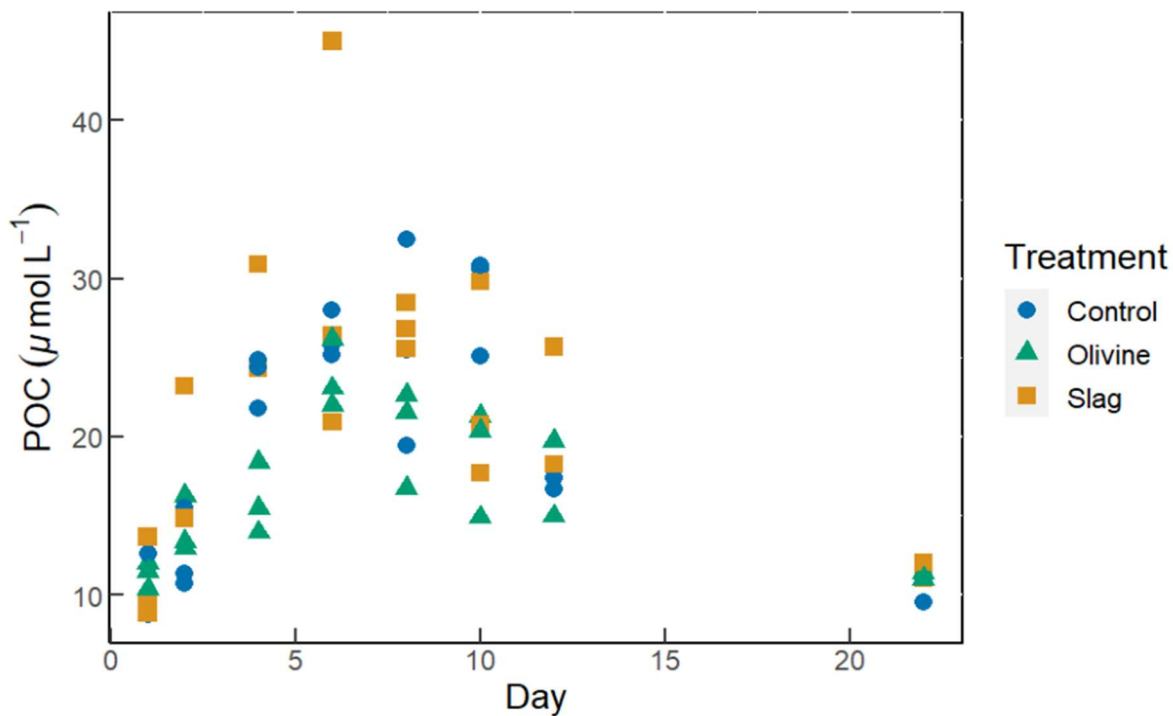

**Fig. S4.** The particulate organic carbon (POC) in microcosms. Each dot represents the POC in a microcosm on the sampling day. Part of the data from day 12 to day 22 were missing due to a measurement facility issue.



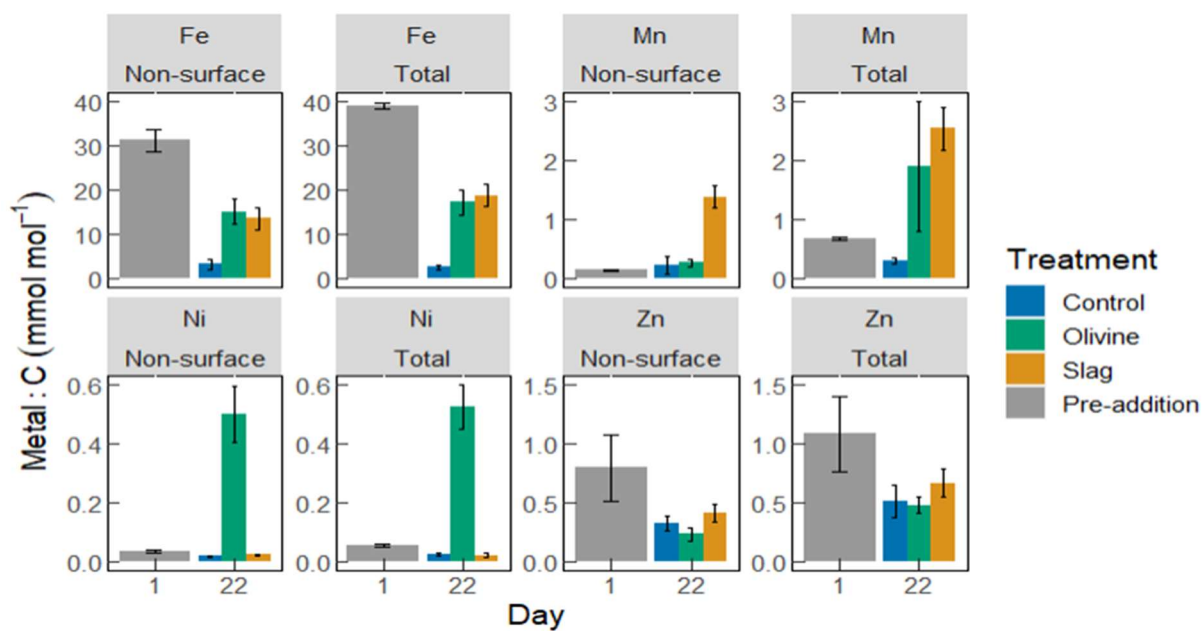

**Fig. S5.** Particulate trace metal concentrations normalized to particulate carbon concentrations. “Total” indicates the total particulate trace metal concentrations, and “Non-surface” indicates the particulate trace metal concentrations after oxalate wash. On day 1,  $n=2$  for non-surface pre-addition data. For all other data presented  $n=3$ .
